# Supplementary material
Source: MDPI journal article supplement (https://www.mdpi.com/1996-1073/16/17/6131)
Supplement: s1 [file s1]

# Hydrogen-Free Deoxygenation of Oleic Acid and Industrial Vegetable Oil Waste on CuNiAl Catalysts for Biofuel Production

Jose Sabino <sup>1</sup>, Denisson O. Liborio <sup>1</sup>, Santiago Arias <sup>1</sup>, Juan F. Gonzalez <sup>1</sup>,  
Celmy M. B. M. Barbosa <sup>1</sup>, Florival R. Carvalho <sup>2</sup>, Roger Frety <sup>1</sup>, Ivoneide C. L. Barros <sup>3,\*</sup>  
and Jose Geraldo A. Pacheco <sup>1,\*</sup>

<sup>1</sup> Laboratory of Refining and Cleaner Technology (LabRefino/Lateclim), Institute for Petroleum and Energy Research (LITPEG), Department of Chemical Engineering, Center of Technology and Geosciences, Federal University of Pernambuco, Recife 50740-540, PE, Brazil

<sup>2</sup> Fuel Laboratory, Institute for Petroleum and Energy Research (LITPEG), Department of Chemical Engineering, Center of Technology and Geosciences, Federal University of Pernambuco, Recife 50740-540, PE, Brazil

<sup>3</sup> Department of Chemistry, Federal Rural University of Pernambuco, Recife 52171-900, PE, Brazil

\* Correspondence: ivoneide.lopes@ufrpe.br (I.C.L.B.); jose.pacheco@ufpe.br (J.G.A.P.)

**Table S1.** Calculated  $d$  values from the reflection peaks ( $2\theta < 30^\circ$ ) of the NiAl and CuNiAl LDHs.

| Sample   | Reflections |       |       |      |       |       |      |       |        |      |       |
|----------|-------------|-------|-------|------|-------|-------|------|-------|--------|------|-------|
|          | (003)       |       | (006) |      |       | (009) |      |       | (0012) |      |       |
|          | 2θ°         | d(Å)  | 2θ°   | d(Å) | 2d(Å) | 2θ°   | d(Å) | 3d(Å) | 2θ°    | d(Å) | 4d(Å) |
| NiAl     | 6.37        | 13.87 | 12.70 | 6.96 | 13.93 | 19.09 | 4.65 | 13.94 | 25.47  | 3.49 | 13.98 |
| NiCuAl-1 | 6.37        | 13.86 | 12.73 | 6.95 | 13.89 | 19.10 | 4.64 | 13.93 | 25.48  | 3.49 | 13.97 |
| NiCuAl-2 | 6.34        | 13.94 | 12.68 | 6.98 | 13.95 | 19.07 | 4.65 | 13.95 | 25.42  | 3.50 | 14.00 |
| NiCuAl-3 | 6.35        | 13.92 | 12.70 | 6.97 | 13.93 | 19.07 | 4.65 | 13.95 | 25.44  | 3.50 | 13.99 |

**Table S2.** Thermogravimetric analyses: comparison between theoretical and experimental mass loss percentages for the NiAl and CuNiAl LDHs.

| Sample        | Mass loss (%) |             | Difference (%) |
|---------------|---------------|-------------|----------------|
|               | Experimental  | Theoretical |                |
| NiAl-LDH      | 48.8          | 52.1        | 6.3            |
| 0.1CuNiAl-LDH | 51.6          | 51.6        | 0.1            |
| 0.2CuNiAl-LDH | 49.7          | 51.5        | 3.6            |
| 0.4CuNiAl-LDH | 50.4          | 50.7        | 0.5            |
